# Psychological and Behavioral Correlates of Baseline BMI in the Diabetes Prevention Program (DPP)

LINDA M. DELAHANTY, MS, RD<sup>1</sup>  
JAMES B. MEIGS, MD, MPH<sup>2</sup>  
DOUG HAYDEN, MA<sup>3</sup>

DONALD A. WILLIAMSON, PHD<sup>4</sup>  
DAVID M. NATHAN, MD<sup>1</sup>  
THE DPP RESEARCH GROUP

**OBJECTIVE** — To determine psychological and behavioral correlates of baseline BMI in the Diabetes Prevention Program (DPP).

**RESEARCH DESIGN AND METHODS** — Of 1,079 DPP lifestyle intervention participants, 274 completed validated questionnaires at baseline assessing weight loss history, stage of change, self-efficacy, dietary restraint, emotional eating, binge eating, perceived stress, depression, and anxiety.

**RESULTS** — The mean age of subjects was 52.5 years, 65% were women, and their mean BMI was 33.9 kg/m<sup>2</sup>. Higher BMI correlated with more frequent weight cycling ( $r = 0.50$ ,  $P < 0.0001$ ) and efforts at weight loss ( $r = 0.34$ ,  $P < 0.0001$ ); younger age when first overweight ( $r = -0.42$ ,  $P < 0.0001$ ); lower exercise efficacy ( $r = -0.15$ ,  $P = 0.015$ ); lower weight loss efficacy ( $r = -0.21$ ,  $P < 0.001$ ); a less advanced stage of change for weight loss ( $r = -0.12$ ,  $P = 0.04$ ); more perceived stress ( $r = 0.14$ ,  $P = 0.02$ ); emotional eating ( $r = 0.19$ ,  $P = 0.001$ ); poor dietary restraint ( $r = -0.14$ ,  $P = 0.02$ ); binge eating frequency ( $r = 0.18$ ,  $P = 0.004$ ) and severity ( $r = 0.30$ ,  $P < 0.0001$ ); feeling deprived, angry, or upset while dieting ( $r = 0.27$ ,  $P \leq 0.0001$ ); and food cravings while dieting ( $r = 0.31$ ,  $P < 0.0001$ ). Correlations did not differ as a function of sex; however, correlations of BMI with anxiety and low-fat diet and weight loss self-efficacy differed as a function of ethnicity. In multivariate models, binge eating severity, poor dietary restraint, and food craving were independent correlates of baseline BMI.

**CONCLUSIONS** — Many psychological and behavioral factors are associated with higher BMI in this ethnically diverse group of men and women. Whether strategies that help patients increase levels of dietary restraint and reduce binge eating and food craving lead to long-term weight loss maintenance needs longitudinal study.

*Diabetes Care* 25:1992–1998, 2002

The Diabetes Prevention Program (DPP) was a randomized clinical trial comparing the efficacy of intensive lifestyle, metformin, and placebo in the prevention of type 2 diabetes in people with impaired glucose tolerance. Subjects randomly assigned to the lifestyle intervention had goals of losing at least 7% of their body weight and maintaining

activity levels at  $\geq 150$  min per week over 3–6 years (1). Psychological and behavioral determinants of eating and exercise behaviors may be strong predictors of body weight, and understanding these determinants is critical to the goals and outcomes of the DPP. Self-efficacy, perceived stress, depression, anxiety, dietary restraint, emotional eating, binge eating,

and stage of change related to weight loss are potentially modifiable variables frequently cited in the literature as important correlates of body weight (2–14). However, it is unclear which of these psychological and behavioral measures are the most robust correlates of weight outcomes. Moreover, most of the research on these correlates of weight outcomes has been conducted primarily in young and middle-aged Caucasian women. Data for men, other races and ethnicities, and older age groups, each of which is well represented in the DPP, are very limited.

We hypothesized that greater readiness to lose weight, higher self-efficacy, and higher dietary restraint would be correlated with lower BMI and that perceived stress, depression, anxiety, binge eating, and frequency of emotional eating would be correlated with higher BMI. In this report, we examine two primary questions: What are the psychological and behavioral correlates of baseline BMI in subjects randomized to the lifestyle intervention of the DPP (1)? And, what is the relationship among self-efficacy, perceived stress, depression, anxiety, stage of change related to weight loss, and eating behavior (dietary restraint, emotional eating, and binge eating) and the relative importance of these factors for baseline BMI in the DPP? A secondary question was whether the psychological and behavioral correlates of baseline BMI differed as a function of sex and race-ethnicity.

## RESEARCH DESIGN AND METHODS

### Study participants and procedures

This substudy was conducted during the final year of recruitment for the DPP and enrolled 274 of the final 293 (94%) lifestyle participants from 18 of 27 DPP centers that agreed to participate. Of the nine centers that did not participate in this substudy, two were not invited because they had already randomized almost all of their center cohorts and the other seven declined to participate to minimize participant burden as they had elected to par-

From the <sup>1</sup>Diabetes Center, Massachusetts General Hospital, Boston, Massachusetts; the <sup>2</sup>General Medicine Division, Massachusetts General Hospital, Boston, Massachusetts; the <sup>3</sup>Biostatistics Center, Massachusetts General Hospital, Boston, Massachusetts; and the <sup>4</sup>Pennington Biomedical Research Center, Baton Rouge, Louisiana.

Address correspondence and reprint requests to Linda M. Delahanty, MS, RD, Massachusetts General Hospital, Diabetes Center, 50 Staniford St., Suite 340, Boston, MA 02114. E-mail: ldelahanty@partners.org. Received for publication 2 April 2002 and accepted in revised form 7 August 2002.

**Abbreviations:** BES, Binge Eating Scale; DPP, Diabetes Prevention Program.

A table elsewhere in this issue shows conventional and Système International (SI) units and conversion factors for many substances.

Table 1—Baseline study sample characteristics

|                          | DPP lifestyle cohort | Ancillary study subcohort |
|--------------------------|----------------------|---------------------------|
| N                        | 1079 (27 centers)    | 274 (18 centers)          |
| Age (years)              | 50.6 ± 11.3          | 52.5 ± 12.1               |
| Sex                      |                      |                           |
| Male                     | 345 (32)             | 97 (35)                   |
| Female                   | 734 (68)             | 177 (65)                  |
| Race/Ethnicity           |                      |                           |
| Caucasian                | 580 (54)             | 171 (62)                  |
| African-American         | 204 (19)             | 54 (20)                   |
| Hispanic                 | 178 (17)             | 38 (14)                   |
| American Indian          | 60 (6)               | 0 (0)                     |
| Asian                    | 57 (5)               | 11 (4)                    |
| BMI (kg/m <sup>2</sup> ) | 33.9 ± 6.8           | 33.9 ± 6.9                |
| <25                      | 38 (3)               | 8 (3)                     |
| 25–29.9                  | 320 (30)             | 80 (29)                   |
| ≥30                      | 721 (67)             | 186 (68)                  |

Data are n (%) or means ± SD.

ticipate in other ancillary studies. Eligibility criteria and the baseline characteristics of the DPP cohort have been previously described (15). Participants had to have impaired glucose tolerance, BMI ≥24 kg/m<sup>2</sup> (≥22 kg/m<sup>2</sup> for Asian-Americans) and be at least 25 years of age (15). Other than slight differences in the racial distribution in the subcohort included in this study, the baseline characteristics were identical to those in the entire lifestyle group (Table 1).

We measured psychological and behavioral factors at baseline, 6 months, 1 year, and study end (2–3 years after randomization). This report describes the baseline results. After randomization to the lifestyle intervention of the DPP, participants were asked to complete self-administered questionnaires assessing weight loss history and psychological and behavioral variables.

## Measures

Weight loss self-efficacy was assessed with the Weight Efficacy Lifestyle Questionnaire (WEL) (16). This previously validated and reliable instrument was designed to assess confidence in resisting overeating in 20 tempting situations, including food availability, negative emotions, physical discomfort, positive activities, and social pressure (16,17). Respondents were asked to rate their confidence using a 10-point Likert-type scale with higher numbers indicating greater confidence about resisting overeating. Low-fat diet self-efficacy was measured

with a validated 16-item scale (18) that measures confidence about performing healthy diet behaviors. Respondents rate their confidence on a 5-point Likert scale (1 = “very little” and 5 = “quite a lot”). The 5-item, validated exercise self-efficacy scale measured confidence in ability to exercise in various situations, representing negative affect, resisting relapse, and making time for exercise. A 7-point scale is used to rate each item (1 = “not at all confident” and 7 = “very confident”) (19).

Perceived stress was measured with the Perceived Stress Questionnaire (21). In contrast to life event scales that list specific “worries,” the validated 30-item Perceived Stress Questionnaire is a subjective measure intended to maximize sensitivity to ongoing stress by assessing feelings of being under pressure from current life events. Responses range from 1 = “almost never” to 4 = “usually,” and scores are positively associated with stressful life events. The scale has been successful in demonstrating a relation between psychological factors and objective evidence of disease activity (20).

Emotional eating behavior was assessed with a validated 5-item instrument (9) that measures the desire to eat and eating frequency in response to five different categories of emotions (“disappointed,” “depressed or discouraged,” “anxious, worried or tense,” “cross,” and “emotionally upset”). Respondents are asked to score from 0 to 10 (0 = never and 10 = always) on how frequently they

have something to eat when in that emotional state. This scale assesses actual eating in response to emotions and has proved to be more strongly associated with weight control than instruments that measure the desire to eat in response to emotions (9). The Binge Eating Scale (BES) (21) measures behaviors, feelings, and thoughts associated with binge eating episodes, giving a global score of eating disturbance. Although the original 16-item scale has been used in several clinical research trials (21–24), a shorter 5-item version of this scale, which has been proposed to identify binge eaters more accurately (24), was used in this study.

The 10-item Restraint Subscale of the Dutch Eating Behavior Questionnaire (DEBQ) (25–27) measured dietary restraint. It has been shown to have high test-retest reliability, high internal consistency, and stable factor structure across sexes, weight categories, and random samples (28). Respondents are asked to score from 1 to 5 (1 = never and 5 = very often) how often they use 10 different dietary restraint behaviors. The Stage of Change Algorithm for Weight Loss (14), consisting of a brief series of self-report questions assessing weight loss intentions and activities, was used. No reliability data for the stages of change algorithm for weight control are available; however, the stages of change construct has been found reliable across a wide range of other problem behaviors, including inadequate exercise and limiting high-fat foods (19,29).

In addition to completing the questionnaires, participants also reported their weight history including age of onset of obesity, frequency of weight cycling (change of 20 lbs or more), and number of previous attempts with self-imposed and formal weight loss programs. They also answered one question regarding the degree to which they felt deprived while dieting and one question regarding the degree to which they “fantasized a lot about favorite foods while dieting” (craving), with scores from 1 to 5 with 1 = “never” and 5 = “always” (30). In addition to the BES, which addressed binge eating severity, the frequency of binge eating versus episodic overeating was assessed using the first three questions from the Questionnaire on Eating and Weight Patterns (31). As part of the DPP, all participants also completed the Beck Depression and Anxiety Inventory (32,33). Specially trained outcomes staff measured

Table 2—Association of baseline BMI with weight loss experience and motivation

|                                                     | N (%)    | BMI<br>(means $\pm$ SD) | Correlation<br>coefficient ( <i>r</i> ) | <i>P</i> |
|-----------------------------------------------------|----------|-------------------------|-----------------------------------------|----------|
| Weight cycling (lost and regained<br>$\geq 20$ lbs) |          |                         | 0.50                                    | <0.0001  |
| Never                                               | 98 (36)  | 30.0 $\pm$ 4.7          |                                         |          |
| 1–2 times                                           | 78 (28)  | 34.0 $\pm$ 4.6          |                                         |          |
| 3–4 times                                           | 55 (20)  | 35.6 $\pm$ 6.3          |                                         |          |
| $\geq 5$ times                                      | 43 (16)  | 40.1 $\pm$ 9.2          |                                         |          |
| Self-imposed weight loss attempts                   |          |                         | 0.34                                    | <0.0001  |
| Never                                               | 31 (11)  | 28.9 $\pm$ 3.3          |                                         |          |
| 1–2 times                                           | 58 (21)  | 31.6 $\pm$ 5.4          |                                         |          |
| 3–4 times                                           | 63 (23)  | 34.6 $\pm$ 5.2          |                                         |          |
| $\geq 5$ times                                      | 122 (45) | 35.8 $\pm$ 7.9          |                                         |          |
| Weight loss programs                                |          |                         | 0.34                                    | <0.0001  |
| Never                                               | 133 (49) | 31.9 $\pm$ 6.0          |                                         |          |
| 1–2 times                                           | 75 (27)  | 33.7 $\pm$ 5.7          |                                         |          |
| 3–4 times                                           | 30 (11)  | 37.9 $\pm$ 6.0          |                                         |          |
| $\geq 5$ times                                      | 36 (13)  | 38.0 $\pm$ 9.4          |                                         |          |
| Food craving while dieting                          |          |                         | 0.31                                    | <0.0001  |
| Never                                               | 61 (22)  | 31.0 $\pm$ 5.0          |                                         |          |
| Rarely                                              | 78 (28)  | 33.3 $\pm$ 5.4          |                                         |          |
| Occasionally                                        | 95 (35)  | 34.7 $\pm$ 6.7          |                                         |          |
| Frequently                                          | 33 (12)  | 38.8 $\pm$ 9.6          |                                         |          |
| Always                                              | 7 (3)    | 34.8 $\pm$ 8.3          |                                         |          |
| Deprived, angry, or upset while<br>dieting          |          |                         | 0.27                                    | <0.0001  |
| Never                                               | 59 (22)  | 31.0 $\pm$ 4.9          |                                         |          |
| Rarely                                              | 86 (31)  | 33.3 $\pm$ 5.8          |                                         |          |
| Occasionally                                        | 96 (35)  | 35.3 $\pm$ 7.7          |                                         |          |
| Frequently                                          | 27 (10)  | 36.1 $\pm$ 8.3          |                                         |          |
| Always                                              | 6 (2)    | 38.4 $\pm$ 5.6          |                                         |          |
| Weight stage                                        |          |                         | –0.12                                   | 0.04     |
| Precontemplation                                    | 13 (5)   | 40.1 $\pm$ 7.6          |                                         |          |
| Contemplation                                       | 44 (16)  | 33.3 $\pm$ 7.8          |                                         |          |
| Preparation                                         | 48 (18)  | 33.9 $\pm$ 5.7          |                                         |          |
| Action                                              | 67 (24)  | 34.4 $\pm$ 7.0          |                                         |          |
| Maintenance                                         | 102 (37) | 33.0 $\pm$ 6.4          |                                         |          |

Pearson correlation coefficients. *P* value for significance of correlation between weight loss experience and BMI.

body weight (after shoes and heavy clothing were removed and recorded to the nearest 0.1 kg) and height (with a wall-mounted stadiometer to the nearest 0.1 cm) according to a standardized protocol. Then, BMI was calculated.

### Statistical analysis

To test the primary aims of this study, we used Pearson correlation coefficients to assess the relations between psychological and behavioral variables and the relations between age, weight history, these variables, and baseline BMI. To test the relative importance of the psychological and behavioral variables, we used step-

wise multivariate regression to assess the independent association of these factors with baseline BMI. For each variable, a *P* value of 0.15 was required for entry into the model and a *P* value of 0.05 was required to stay in the model. To assess the robustness of the final model, we first added age, sex, and race-ethnicity to the model and then, in a separate analysis, we used generalized estimating equations (SAS GENMOD procedure) to test whether adding center as a cluster effect would change the final model. ANOVA was used to test for differences in baseline BMI by sex and race-ethnicity. To test the secondary aims of the study, multiple re-

gression analysis was used to assess the interaction of sex and race-ethnicity with the psychological and behavioral correlates of BMI (Asians were not included due to the small number of subjects). With 150 patients, we estimated we had 90% probability of finding a correlation to be significant if its true value was  $\geq 0.26$  at a two-sided 0.05 significance level. This value is similar to the correlation found by Clark et al. (34) with respect to self-efficacy and weight outcomes. We anticipated a 10% drop-out rate in terms of returned questionnaire packets; therefore, we needed a minimum of 165 participants to enroll in this study. *P* values are two-sided and are not adjusted for multiple comparisons.

**RESULTS**— The 274 lifestyle participants enrolled in this study from 18 DPP centers represent approximately one-fourth of the lifestyle cohort in the DPP ( $n = 1,079$ ) (Table 1). This subgroup appears to be representative of the total lifestyle group in terms of age, sex, initial BMI, and race, except that the American Indian centers did not participate in this substudy (Table 1). At baseline, the mean BMI for women ( $34.7 \pm 7.2$  kg/m<sup>2</sup>) was significantly higher than that for men ( $32.3 \pm 5.9$  kg/m<sup>2</sup>,  $P = 0.005$ ), and higher BMI was correlated with younger age ( $r = -0.32$ ,  $P < 0.0001$ ). Average age when first overweight was  $25 \pm 14$  years, and younger age when first overweight was correlated with higher BMI ( $r = -0.42$ ,  $P = <0.001$ ). We also found significant differences in mean BMI for each ethnic group with a mean BMI of  $36.2 \pm 8.2$  kg/m<sup>2</sup> for African-Americans,  $33.6 \pm 6.4$  for Caucasians,  $32.9 \pm 5.6$  for Hispanics, and  $30.8 \pm 7.7$  for Asians ( $P = 0.02$ ).

### Weight loss experience and motivation

The self-reported weight history (Table 2) revealed the following. Almost 90% had previously tried to lose weight on their own with 45% trying to lose weight on at least five occasions, and almost two-thirds had lost and regained  $\geq 20$  lbs (weight cycling) at least once in the past. Approximately half of the group had never tried a formal weight loss program. Baseline BMI in the DPP was positively associated with more frequent attempts at weight loss in the past; more frequent

**Table 3—Correlation of baseline BMI and psychological and behavioral variables**

|                           | N (%) <sup>*</sup> | Score (means ± SD) | Correlation coefficient (r) | P       |
|---------------------------|--------------------|--------------------|-----------------------------|---------|
| Exercise efficacy         |                    | 5.0 ± 1.2          | −0.15                       | 0.015   |
| Weight loss self-efficacy |                    | 139.6 ± 23.4       | −0.21                       | <0.001  |
| Low-fat diet efficacy     |                    | 4.0 ± 0.6          | −0.13                       | 0.035   |
| Perceived stress          |                    | 0.3 ± 0.2          | 0.14                        | 0.02    |
| Emotional eating          |                    | 2.9 ± 2.7          | 0.19                        | 0.001   |
| Dietary restraint         |                    | 2.8 ± 0.7          | −0.14                       | 0.02    |
| Depression <sup>†</sup>   |                    | 4.1 ± 4.1          | 0.10                        | 0.10    |
| Anxiety <sup>†</sup>      |                    | 3.4 ± 4.0          | 0.10                        | 0.10    |
| Binge eating severity     |                    | 0.7 ± 0.6          | 0.30                        | <0.0001 |
| BMI (mean ± SD)           |                    |                    |                             |         |
| Binge eating frequency    |                    |                    | 0.18                        | .004    |
| No overeating             | 161 (59)           | 33.3 ± 6.5         |                             |         |
| Episodic overeating       | 61 (22)            | 32.9 ± 5.2         |                             |         |
| Binge eating              | 52 (19)            | 36.9 ± 8.7         | 0.27                        | .05     |
| <1 day/week               | 15 (29)            | 33.4 ± 5.5         |                             |         |
| 1 day/week                | 13 (25)            | 37.9 ± 11.4        |                             |         |
| 2–3 days/week             | 21 (40)            | 37.8 ± 6.5         |                             |         |
| 4–5 days/week             | 3 (6)              | 44.2 ± 18.0        |                             |         |

Pearson correlation coefficients and *P* value for significance of correlations between psychological and behavioral variables and BMI. <sup>\*</sup>Of 274 patients; <sup>†</sup>*n* = 268 for depression and anxiety due to missing data.

weight cycling; feeling deprived, angry, or upset; and fantasizing “a lot” about favorite foods while dieting (craving). Heavier subjects also seemed to have the least motivation to lose weight as measured by stage of change related to weight loss.

### Psychological and behavioral variables

Of the participants, 22% reported episodic overeating and 9% reported binge eating ≥2 days per week (Table 3). Lower exercise efficacy, lower weight loss, low-

fat diet self-efficacy, higher perceived stress, emotional eating, poor dietary restraint, and binge eating frequency and severity all correlated with higher baseline BMI. There was no significant relation between depression or anxiety scores and baseline BMI. In addition, there was no significant first-order interaction by sex on the association between psychological and behavioral variables and baseline BMI. However, there was significant interaction by ethnic group for the relation between BMI and anxiety (*P* = 0.017),

low-fat diet self-efficacy (*P* = 0.007), and weight loss self-efficacy (*P* = 0.015), indicating that the correlation between BMI and these variables differed by ethnic group. The correlation of anxiety with BMI was negative in African-Americans but was positive in Caucasians and Hispanics. For the self-efficacy measures, the correlations, although different in strength, had the same direction.

Stepwise regression testing the independent association of BMI with weight loss self-efficacy, exercise self-efficacy, restraint, binge eating frequency and severity, emotional eating, low-fat diet self-efficacy, perceived stress, depression, anxiety, craving, deprived, and weight stage of change revealed that the significant baseline correlates of BMI were binge eating severity ( $\beta$  = 2.25 ± 0.70, *P* = 0.0016), dietary restraint ( $\beta$  = −1.38 ± 0.56, *P* = 0.0147), and craving ( $\beta$  = 1.42 ± 0.41, *P* = 0.0007). These three factors explained 15% of the variance in BMI. When the model was further adjusted for age, sex, and race-ethnicity and when center was added as a cluster effect, binge eating severity and craving remained significant and the effect of dietary restraint was reduced ( $\beta$  = −1.03 ± 0.62, *P* = 0.098).

The relations between the modifiable psychological and behavioral variables are shown in Table 4 and provide insights about the three independent correlates of BMI. Those participants with more severe binge eating behavior had less self-confidence in the ability to lose weight but not necessarily less confidence about following a low-fat diet. Binge eating severity was correlated with emotional eat-

**Table 4—Correlations of weight loss self-efficacy, restraint, binge severity, emotional eating, low-fat diet efficacy, perceived stress, craving, stage of change, depression, anxiety, and binge eating frequency**

|                        | Weight loss self-efficacy | Restraint         | Binge severity    | Emotional eating   | Low-fat diet efficacy | Perceived stress  | Craving           | Weight stage       | Depression        | Anxiety |
|------------------------|---------------------------|-------------------|-------------------|--------------------|-----------------------|-------------------|-------------------|--------------------|-------------------|---------|
| Restraint              | 0.15 <sup>*</sup>         |                   |                   |                    |                       |                   |                   |                    |                   |         |
| Binge severity (BES)   | −0.32 <sup>†</sup>        | −0.01             |                   |                    |                       |                   |                   |                    |                   |         |
| Emotional eating       | −0.48 <sup>†</sup>        | −0.10             | 0.53 <sup>†</sup> |                    |                       |                   |                   |                    |                   |         |
| Low-fat diet efficacy  | 0.55 <sup>†</sup>         | 0.18 <sup>‡</sup> | −0.10             | −0.21 <sup>§</sup> |                       |                   |                   |                    |                   |         |
| Perceived stress       | −0.38 <sup>†</sup>        | −0.07             | 0.45 <sup>†</sup> | 0.44 <sup>†</sup>  | −0.28 <sup>†</sup>    |                   |                   |                    |                   |         |
| Craving                | −0.35 <sup>†</sup>        | −0.00             | 0.45 <sup>†</sup> | 0.33 <sup>†</sup>  | −0.24 <sup>†</sup>    | 0.23 <sup>†</sup> |                   |                    |                   |         |
| Weight stage           | 0.05                      | 0.18 <sup>‡</sup> | −0.06             | −0.11              | 0.10                  | −0.07             | −0.06             |                    |                   |         |
| Depression             | −0.15 <sup>*</sup>        | −0.10             | 0.39 <sup>†</sup> | 0.25 <sup>†</sup>  | −0.12 <sup>*</sup>    | 0.51 <sup>†</sup> | 0.19 <sup>‡</sup> | 0.07               |                   |         |
| Anxiety                | −0.14 <sup>*</sup>        | −0.02             | 0.21 <sup>§</sup> | 0.14 <sup>*</sup>  | −0.07                 | 0.27 <sup>†</sup> | 0.02              | 0.04               | 0.48 <sup>†</sup> |         |
| Binge eating frequency | −0.27 <sup>†</sup>        | −0.10             | 0.42 <sup>†</sup> | 0.30 <sup>†</sup>  | −0.10                 | 0.21 <sup>§</sup> | 0.23 <sup>†</sup> | −0.13 <sup>*</sup> | 0.18 <sup>‡</sup> | 0.12    |

Pearson correlation coefficients for all interrelationships. <sup>\*</sup>*P* ≤ 0.05; <sup>†</sup>*P* ≤ 0.01; <sup>‡</sup>*P* ≤ 0.001; <sup>§</sup>*P* < 0.0001.



ing, perceived stress, craving, depression, and anxiety; however, none of these variables was related to dietary restraint. Those who reported more dietary restraint had more self-confidence in the ability to lose weight and to follow a low-fat diet and had greater readiness to lose weight as measured by stage of change related to weight loss. The participants who reported more food cravings while dieting reported less self-efficacy regarding weight loss, less confidence in following a low-fat diet, greater binge eating severity, more emotional eating, more perceived stress, and more depression.

**CONCLUSIONS**— In this representative sample of DPP lifestyle participants, age, sex, race-ethnicity, and weight control history were all significant factors associated with baseline BMI. In addition, many of the psychological and behavioral characteristics, including exercise self-efficacy, weight loss self-efficacy, low-fat diet self-efficacy, weight stage of change, perceived stress, emotional eating, dietary restraint, and binge eating frequency and severity were related to baseline BMI. Moreover, other factors, such as the frequency of feeling deprived, angry, or upset or fantasizing a lot about favorite foods while dieting, were also associated with higher initial BMI. As expected, some of the psychological and behavioral factors were interrelated and some were independent correlates of BMI. Those who had better dietary restraint skills had greater self-efficacy beliefs regarding ability to follow a diet and greater readiness to change regarding weight loss. However, the strongest intercorrelations were found among binge eating severity, perceived stress, emotional eating, weight loss self-efficacy, and food craving. Taking these intercorrelations into account, binge eating severity, dietary restraint, and the frequency of fantasizing a lot about favorite foods appeared to be particularly important independent correlates of obesity.

These results are consistent with previous findings that have shown that sex and race-ethnicity are important factors influencing body weight (35), and that higher BMI is correlated with early onset of obesity (36), repeated attempts at dieting (37), lower self-efficacy (3), low levels of dietary restraint (6–8), emotional eating (25,38,39), and binge eating (40,41). The current results also confirm the relations between higher BMI and levels of

perceived stress (4,5) and demonstrate new associations between BMI and stage of change related to weight loss, feeling deprived while dieting, and fantasizing a lot about favorite foods while dieting.

The interrelationships between binge eating and lower self-efficacy (21,23,42,43), emotional eating (44), depression (43,45,46), and perceived stress (20,21) were confirmed; however, binge eating was also highly correlated with food craving. Even though depression, anxiety, and perceived stress were highly correlated with each other, only perceived stress correlated with baseline BMI in the DPP. Of our participants, 90% had a Beck Depression score  $\leq 10$  and an anxiety score  $\leq 8$ , which may in part be due to study eligibility criteria, which excluded those on greater than the minimal therapeutic dose of selective serotonin uptake inhibitors and those with major psychiatric illness. The low levels of depression and anxiety in our group of DPP participants might explain why neither depression nor anxiety was correlated with baseline BMI, as seen in other studies (47).

This study expands on previous research by examining the relative importance of these psychological and behavioral variables on BMI after adjusting for the effects of age, sex, and race-ethnicity. We have identified the modifiable factors that are most important correlates of BMI in an ethnically diverse group of men and women with impaired glucose tolerance. The finding that the correlation of BMI with anxiety is different in African-Americans than in other ethnic groups is consistent with previous studies suggesting that African-Americans are less distressed by obesity and tend to lose less weight in lifestyle programs such as the DPP (48).

The findings of this study emphasize the important connections among psychological and emotional factors, eating behavior, and BMI and suggest the importance of helping patients learn dietary restraint behaviors and how to manage the stress, negative emotions, and self-talk that may trigger food cravings and binge eating. In most of the recent behavioral weight management interventions, these components are commonly included (1). Our preliminary results suggest that prioritizing strategies that improve dietary restraint skills and reduce binge eating and the frequency of fantasizing about fa-

vorite foods while dieting may be most effective in promoting weight loss.

It is critical to examine these baseline associations longitudinally during the DPP to determine the extent to which the identified psychological and behavioral factors affect the ability to lose weight and keep it off, particularly since the DPP results have conclusively demonstrated that lifestyle intervention reduces the risk of type 2 diabetes by 58% and that metformin reduces the risk of diabetes by 31% over 2.8 years (49). The longitudinal results will help identify new strategies for effective lifestyle modification and maintenance of long-term weight loss, which are key for delaying/preventing diabetes. Moreover, the long-term results may also help health care providers distinguish the psychological and behavioral profiles of patients who are likely to succeed with lifestyle intervention from those who might be more successful with medication to delay/prevent diabetes.

**Acknowledgments**— This study was supported by a research grant from the American Diabetes Association and by the Massachusetts General Hospital General Clinical Research Center (grant no. M01RR01066).

We are grateful to the principal investigators and program coordinators and especially to the DPP volunteers who agreed to support and participate in this study. We are particularly indebted to the lifestyle coaches and program coordinators who assisted in the data collection process. The following 18 DPP centers participated: Pennington Biomedical Research Center, Jefferson Medical College, University of Miami, The University of Texas Health Science Center, Joslin Diabetes Center, University of Washington and Veterans Affairs Puget Sound Health Care System, University of Tennessee, Northwestern University Medical School, Massachusetts General Hospital, University of California (San Diego), St. Luke's Roosevelt Hospital, Indiana University, Medstar Research Institute, Washington University (St. Louis), John Hopkins School of Medicine, University of New Mexico School of Medicine, Albert Einstein College of Medicine, and University of Hawaii.

## References

1. The Diabetes Prevention Program Research Group: The Diabetes Prevention Program: Design and methods for a clinical trial in the prevention of type 2 diabetes. *Diabetes Care* 22:623–634, 1999
2. Bernier M, Avard J: Self-efficacy, outcome, and attrition in a weight-reduction

- program. *Cognitive Therapy and Research* 10:319–338, 1986
3. Kuntz CB, Ronan GF, Ronan DW, Johnson C: Levels of obesity in women: a test of group differences in stress, self-efficacy, and problem-solving (Abstract). *Ann Behav Med* 16 (Suppl.):S082, 1994
  4. Weinstein SE, Shide DJ, Rolls BJ: Changes in food intake in response to stress in men and women: psychological factors. *Appetite* 28:7–18, 1997
  5. Walcott-McQuigg JA: The relationship between stress and weight-control behavior in African-American women. *J Natl Med Assoc* 87:427–432, 1995
  6. McGuire MT, Jeffrey RW, French SA, Hannan PJ: The relationship between restraint and weight and weight-related behaviors among individuals in a community weight gain prevention trial. *Int J Obes Relat Metab Disord* 25:574–580, 2001
  7. Grilo CM: On the relationship of attempting to lose weight, restraint, and binge eating in outpatients with binge eating disorder. *Obesity Res* 8:638–645, 2000
  8. Foster GD, Wadden TA, Swain RM, Stunkard AJ, Platte P, Vogt RA: The Eating Inventory in obese women: clinical correlates and relationship to weight loss. *Int J Obes Relat Metab Disord* 22:778–785, 1998
  9. Blair AJ, Lewis VJ, Booth DA: Does emotional eating interfere with success in attempts at weight control? *Appetite* 15:151–157, 1990
  10. Lavery MA, Loewy JW: Identifying predictive variables for long-term weight change after participation in a weight loss program. *J Am Diet Assoc* 93:1017–1024, 1993
  11. Gormally J, Rardin D, Black S: Correlates of successful response to a behavioral weight control clinic. *J Couns Psychol* 27: 179–191, 1980
  12. Lavery MA, Loewy JW, Kapadia AS, Nichaman MZ, Foreyt JP, Gee M: Long-term follow-up of weight status of subjects in a behavioral weight control program. *J Am Diet Assoc* 89:1259–264, 1989
  13. Prochaska JO, Norcross JC, Fowler JL, Follick MJ, Abrams DB: Attendance and outcome in a work site weight control program: processes and stages of change as process and predictor variables. *Addict Behav* 17:35–45, 1992
  14. O'Connell D, Velicer WF: A decisional balance measure and the stages of change model for weight loss. *Int J Addictions* 23: 729–750, 1988
  15. The Diabetes Prevention Program Research Group: The Diabetes Prevention Program: baseline characteristics of the randomized cohort. *Diabetes Care* 23: 1619–1629, 2000
  16. Clark MM, Abrams DB, Niaura RS: Self-efficacy in weight management. *J Consult Clin Psychol* 59:739–744, 1991
  17. Glynn SM, Ruderman AJ: The development and validation of an Eating Self-Efficacy Scale. *Cognitive Therapy and Research* 10:403–420, 1986
  18. Hickey ML, Owen SV, Froman RD: Instrument development: cardiac diet and exercise self-efficacy. *J Nurs Res* 41:347–351, 1992
  19. Marcus BH, Selby VC, Niaura RS, and Rossi JS: Self-efficacy and the stages of exercise behavior change. *Res Q Exerc Sport* 63:60–66, 1992
  20. Levenstein S, Prantera C, Varvo V, Scribano ML, Berto E, Luzzi C, Andreoli A: Development of the perceived stress questionnaire: a new tool for psychosomatic research. *J Psychosom Res* 37:19–32, 1993
  21. Gormally J, Black S, Daston S, Rardin D: The assessment of binge eating severity among obese persons. *Addict Behav* 7:47–55, 1982
  22. Laporte DJ: Treatment response in obese binge eaters: preliminary results using a very low calorie diet (VLCD) and behavior therapy. *Addict Behav* 17:247–257, 1992
  23. Marcus D, Wing RR, Hopkins J: Obese binge eaters: affect, cognitions and response to behavioral weight control. *J Consult Clin Psychol* 56:433–439, 1988
  24. Greeno CG, Marcus MD, Wing RR: Diagnosis of binge eating disorder: discrepancies between a questionnaire and a clinical interview. *Int J Eat Disord* 17:153–160, 1995
  25. Van Strien T, Frijters JER, Bergers GPA, Defares PB: The Dutch Eating Behavior Questionnaire (DEBQ) for assessment of restrained, emotional and external eating behavior. *Int J Eat Disord* 5:295–315, 1986
  26. Wardle J: The assessment of restrained eating. *Behav Res Ther* 24:213–215, 1986
  27. Wardle J: Eating style: a validation study of the Dutch Eating Behavior Questionnaire in normal subjects and in women with eating disorders. *J Pers Assess* 31:161–169, 1987
  28. Allison DB, Kalinsky LB, Gorman BS: A comparison of the psychometric properties of three measures of dietary restraint. *Psych Assess* 4:391–398, 1992
  29. Greene GW, Rossi SR, Reed GR, Willey C, Prochaska JO: Stages of change for reducing dietary fat to 30% of energy or less. *J Am Diet Assoc* 94:1105–1110, 1994
  30. Brownell KD: Dieting readiness. *Weight Control Dig* 1:5–9, 1990
  31. Spitzer RL, Yanovski S, Wadden T, Wing R, Marcus MD, Stunkard A, Devlin M, Mitchell J, Hasin D, Horne RL: Binge eating disorder: its further validation in a multisite study. *Int J Eat Disord* 13:137–153, 1993
  32. Beck AT, Ward CH, Mendeson M, Mock J, Erbaugh J: An inventory for measuring depression. *Arch Gen Psychiat* 4:561–571, 1961
  33. Beck AT: *Beck Anxiety Inventory*. San Antonio, TX, Psychological Corporation, 1993
  34. Clark MM, Cargill BR, Medeiros ML, Pera V: Changes in self-efficacy following obesity treatment. *Obesity Res* 4:179–181, 1996
  35. National Institutes of Health: Clinical guidelines on the identification, evaluation and treatment of overweight and obesity in adults: the evidence report. *Obes Res* 6:97–106, 1998
  36. McCrone S, Dennis K, Tomoyasu N, Carroll J: A profile of early versus late onset of obesity in postmenopausal women. *J Women's Health and Gender Based Med* 9:1007–1013, 2000
  37. French SA, Jeffrey RW: Current dieting, weight loss history, and weight suppression: behavioral correlates of three dimensions of dieting. *Addict Behav* 22:31–44, 1997
  38. Lowe MR, Fisher EB: Emotional reactivity, emotional eating and obesity: a naturalistic study. *J Behav Med* 6:135–149, 1983
  39. Cox DN, van Galen M, Hedderly D, Perry L, Moore PB, Mela DJ: Sensory and hedonic judgements of common foods by lean consumers and consumers with obesity. *Obes Res* 6:438–447, 1998
  40. Telch CF, Agras WS, Rossiter EM: Binge eating increases with increasing adiposity. *Int J Eat Disord* 7:115–119, 1988
  41. Fitzgibbon ML, Spring B, Avellone ME, Blackman LR, Pingitore R, Stolley MR: Correlates of binge eating in hispanic, black and white women. *Int J Eat Disord* 24:43–52, 1998
  42. Miller PM, Watkins JA, Sargent RG, Rickert EJ: Self-efficacy in overweight individuals with binge eating disorder. *Obesity Res* 7:552–555, 1999
  43. Clark MM, Pera V, Niaura RS, Abrams DB: Binge eating, body image, depression, and self-efficacy in an obese clinical population. *Obesity Res* 7:379–386, 1999
  44. Arnow B, Kenardy J, Agras WS: The emotional eating scale: the development of a measure to assess coping with negative affect by eating. *Int J Eat Disord* 18:79–90, 1995
  45. Sherwood NE, Jeffrey RW, Wing RR: Binge status as a predictor of weight loss treatment outcome. *Int J Obesity Relat Metab Disord* 23:284–293, 1999
  46. Wadden TA, Foster GD, Letizia KA, Wilk JE: Metabolic, anthropometric and psychological characteristics of obese binge eaters. *Int J Eat Disord* 14:17–25, 1993
  47. Musante GJ, Costanzo PR, Friedman KE: The comorbidity of depression and eating dysregulation processes in a diet-seeking obese population: a matter of sex specificity. *Int J Eat Disord* 23:65–75, 1998

48. Klesges RC, eBon M, Myers A: Obesity in African American women: epidemiology, determinants, and treatment issues. In *Body Image, Eating Disorders, and Obesity*. J.K. Thompson, Ed. Washington DC, American Psychological Association, 1996, p. 461–477
49. The Diabetes Prevention Program Research Group: Reduction in the incidence of type 2 diabetes with lifestyle intervention or metformin. *N Engl J Med* 346:393–403, 2002
